# Supplementary material for: Preparation of a NbN/graphene nanocomposite by solution impregnation and its application in high-performance Li-ion hybrid capacitors
Source: Royal Society of Chemistry journal article supplement (doi:10.1039/c7ra01671a), 2017-01-01
Supplement: c7ra01671a1.pdf [file c7ra01671a1.pdf]

## Supporting Information

### **Preparation of NbN/graphene nanocomposite by solution impregnation and its application in high-performance Li-ion hybrid capacitors**

Zhen-Kun Chen <sup>a,b</sup>, Jun-Wei Lang <sup>b</sup>, Ling-Yang Liu <sup>b</sup>, Ling-Bin Kong <sup>a,\*</sup>

<sup>a</sup> State Key Laboratory of Advanced Processing and Recycling of Non-ferrous Metals,  
School of Materials Science and Engineering, Lanzhou University of Technology,  
Lanzhou 730050, PR China

<sup>b</sup> Laboratory of Clean Energy Chemistry and Materials, State Key Laboratory of Solid  
Lubrication, Lanzhou Institute of Chemical Physics, Chinese Academy of Sciences,  
Lanzhou 730000, PR China

\*Corresponding author. Tel.: +86-931-2976579; Fax: +86-931-2976578.

E-mail address: konglb@lut.cn

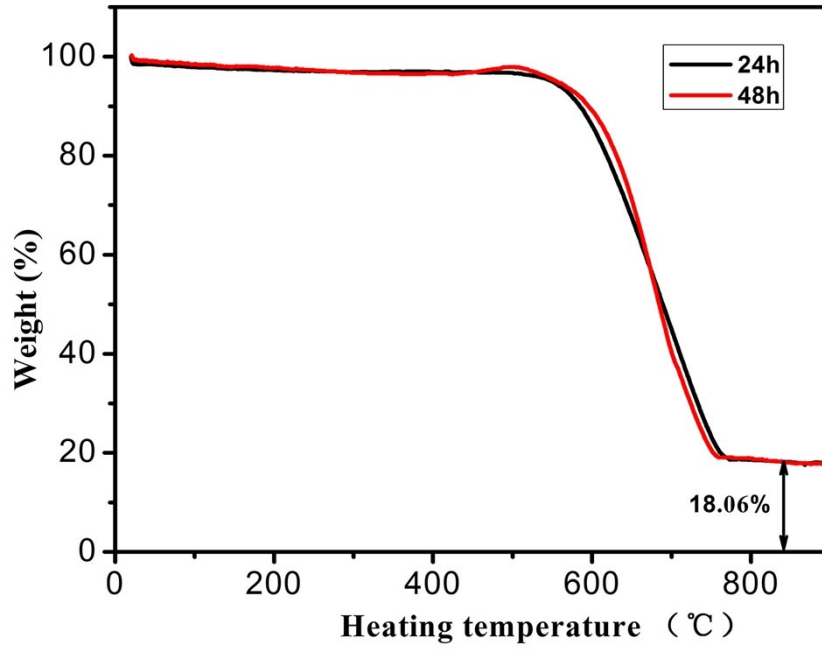

**Fig. S1** TGA curve for the NbN/GNSs with different impregnation time in air (18.06% is the content of Nb<sub>2</sub>O<sub>5</sub>, and the corresponding content of NbN: 14.5% = 18.06% ×

$$\frac{M_{NbN}}{M_{Nb_2O_5}}).$$

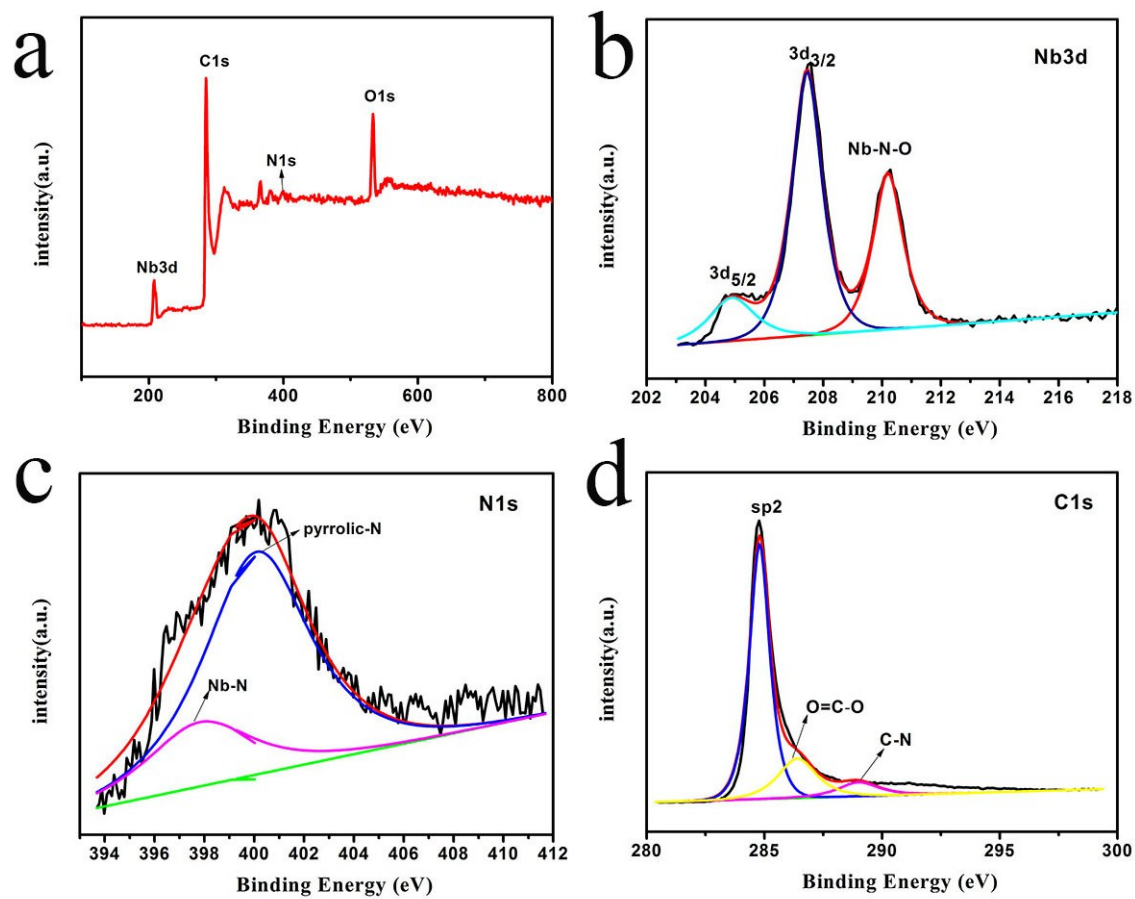

**Fig. S2** (a) XPS survey scan of the NbN/GNSs, (b–d) High resolution XPS spectra for Nb, N, and C, respectively.

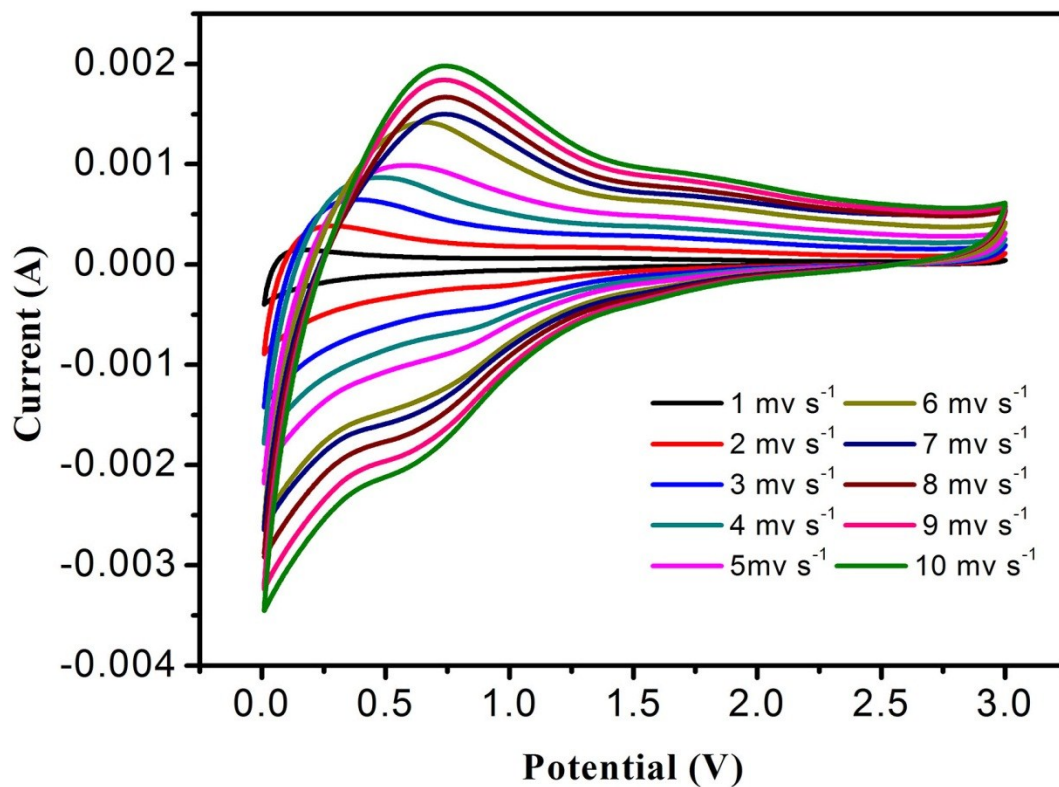

**Fig. S3** CV curves of NbN/ GNSs composite papers at different sweep rates range from 1–10 mV/s.

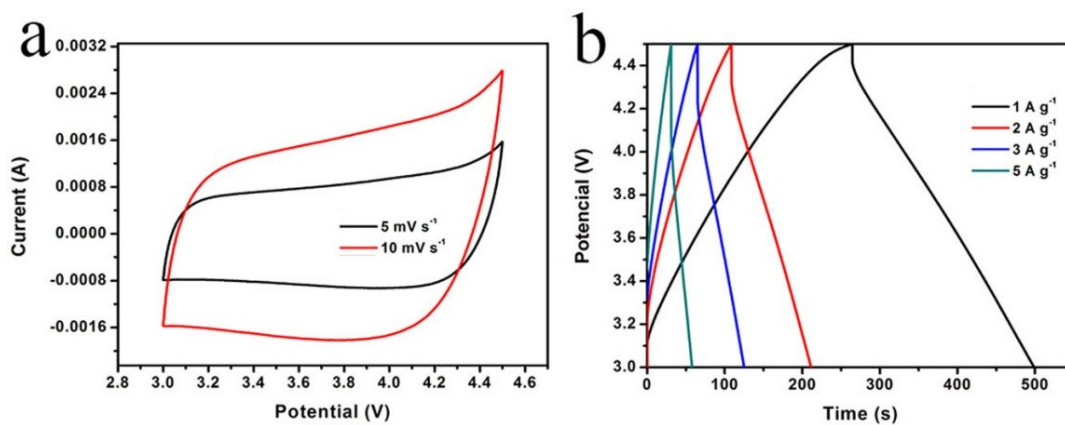

**Fig. S4** (a) CV curves of APDC within the potential region of 3–4.5 V (vs Li/Li<sup>+</sup>). (b) Galvanostatic charge/discharge curves of APDC at different current densities.

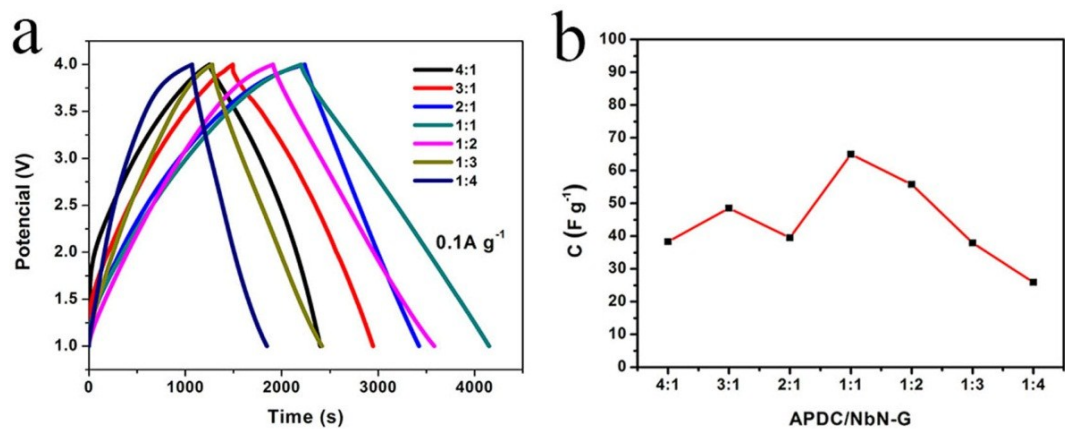

**Fig. S5** (a) Galvanostatic charge/discharge curves of LIHC with the different mass ratios (cathode: anode). (b) The capacity Comparison with different mass ratios of APDC and NbN/G.

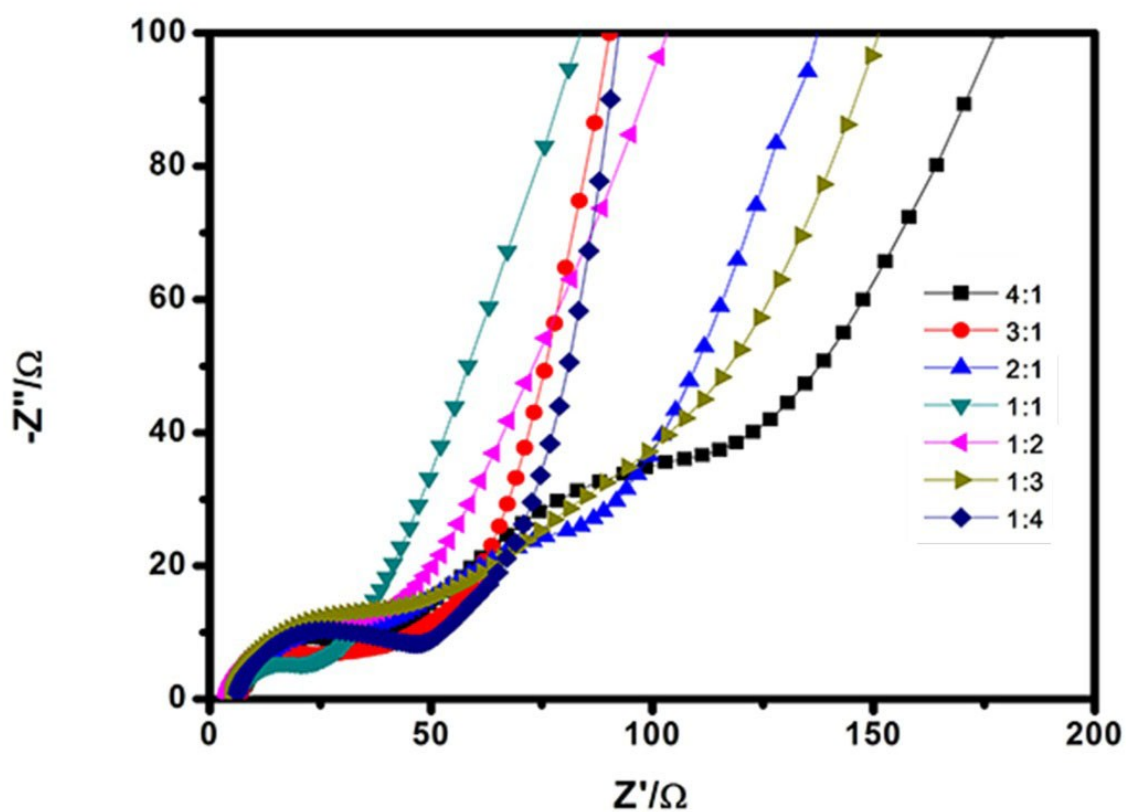

**Fig. S6** Nyquist plots of LIHC with the different mass ratios (cathode: anode).

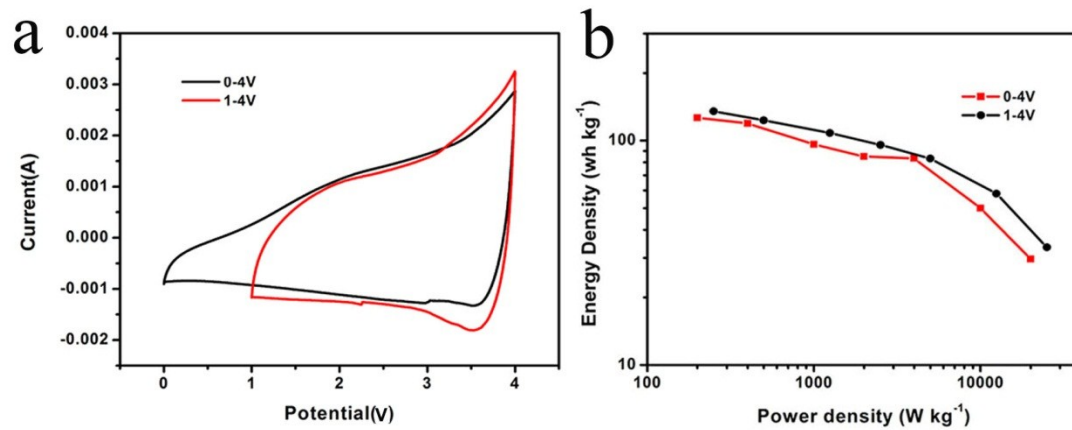

**Fig. S7** (a) CV curves (sweep rates: 20 mV/s) and (b) Ragone plots of LIHC in different potential windows.
